# Supplementary material for: Intense red up-conversion luminescence and dynamical processes observed in Sc2O3:Yb3+,Er3+ nanostructures
Source: Royal Society of Chemistry journal article supplement (doi:10.1039/c7dt03354k), 2017-01-01
Supplement: c7dt03354k1.pdf [file c7dt03354k1.pdf]

## Intense red upconversion luminescence and dynamical processes in $\text{Sc}_2\text{O}_3:\text{Yb}^{3+}, \text{Er}^{3+}$ nanostructure

Junxia Jiu,<sup>a</sup> Xitao An,<sup>a</sup> Jing Li,<sup>b,\*</sup> Jing Leng,<sup>b</sup> Wei Lü,<sup>c</sup> Li Chen,<sup>a,b,\*</sup> Xiaojun Wang,<sup>d</sup>

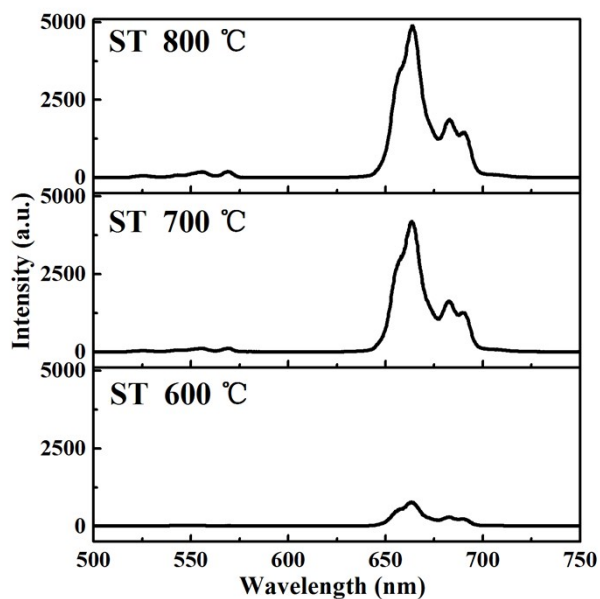

Fig. S1 UCL spectra of ST- $\text{Sc}_2\text{O}_3: 10\% \text{Yb}^{3+}, 1\% \text{Er}^{3+}$  samples at different annealed temperatures (600, 700, and 800 °C).
